# Supplementary material
Source: PubMed Central journal article supplement (PMC5657599)

**Fig. 1g**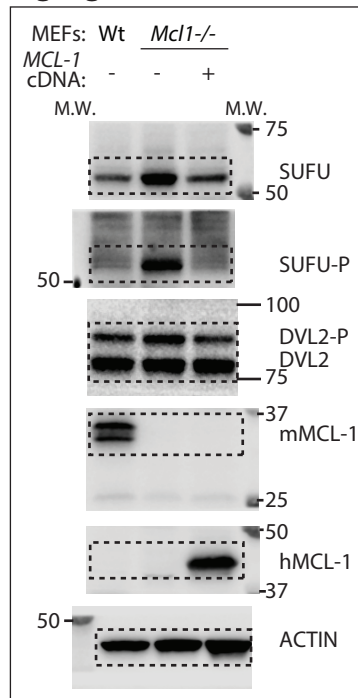**Fig. 1i**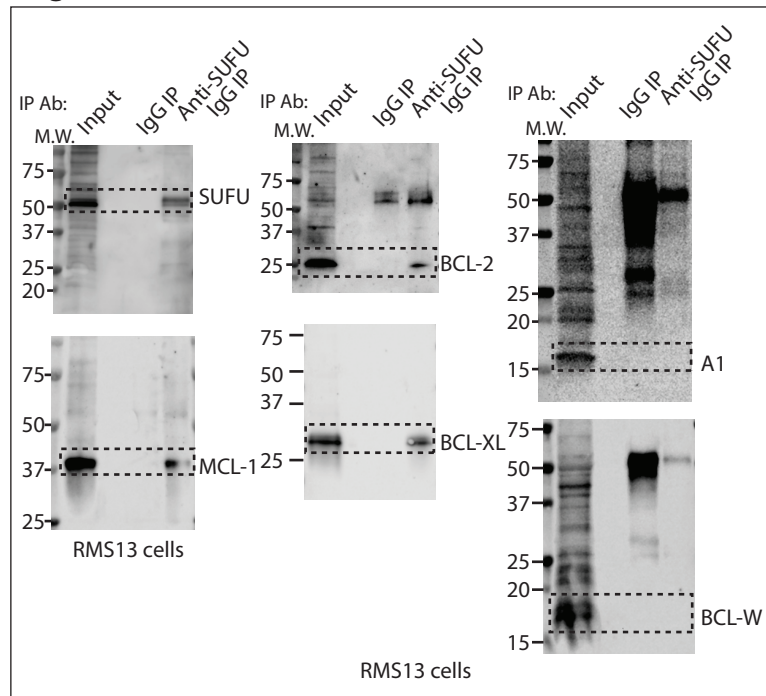**Fig. 1j**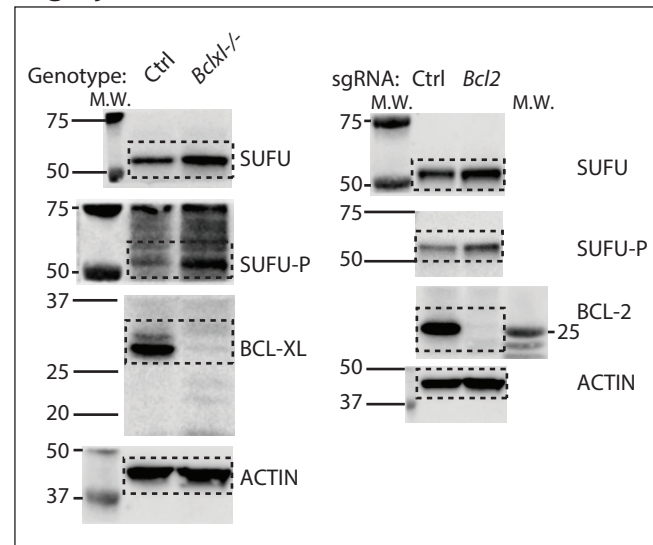**Fig. 2d**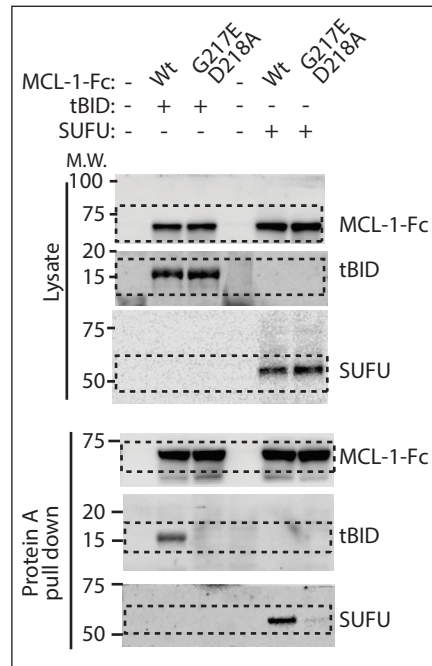**Fig. 2e**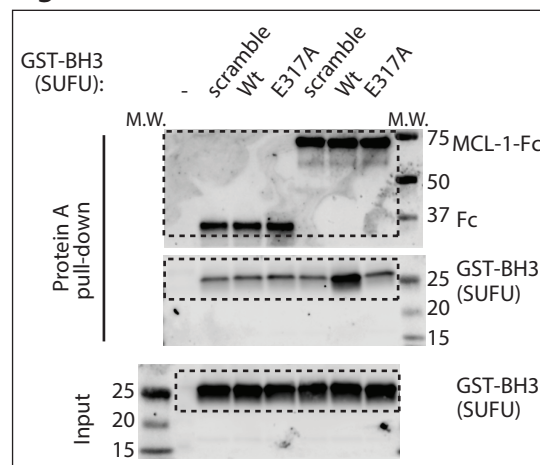**Fig. 2g**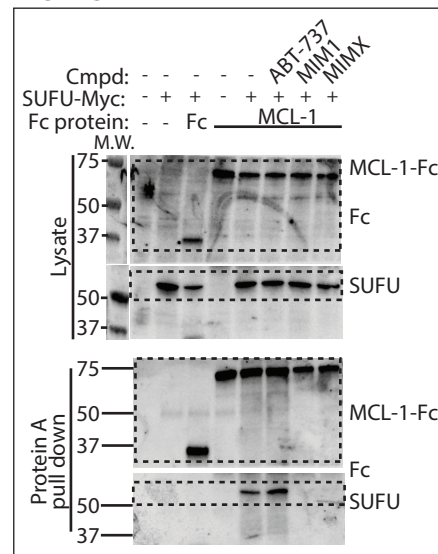**Fig. 2i**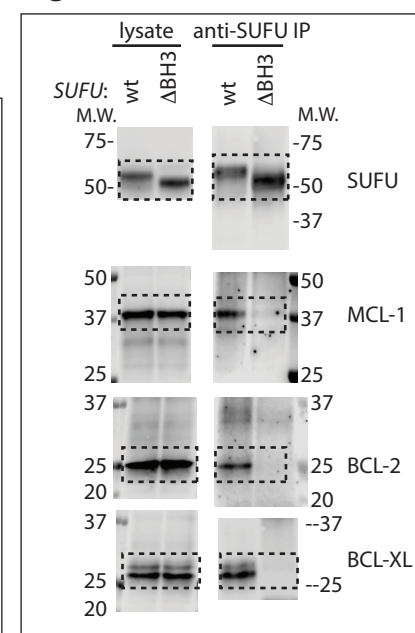

**Supplementary Figure 7.** Unprocessed images of blots. Unprocessed images of all immunoblots shown in Figures and Supplementary Figures are provided.

**Fig. 2k**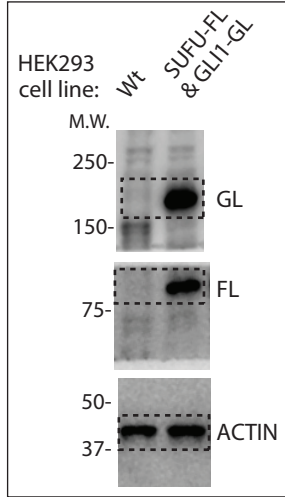**Fig. 3b**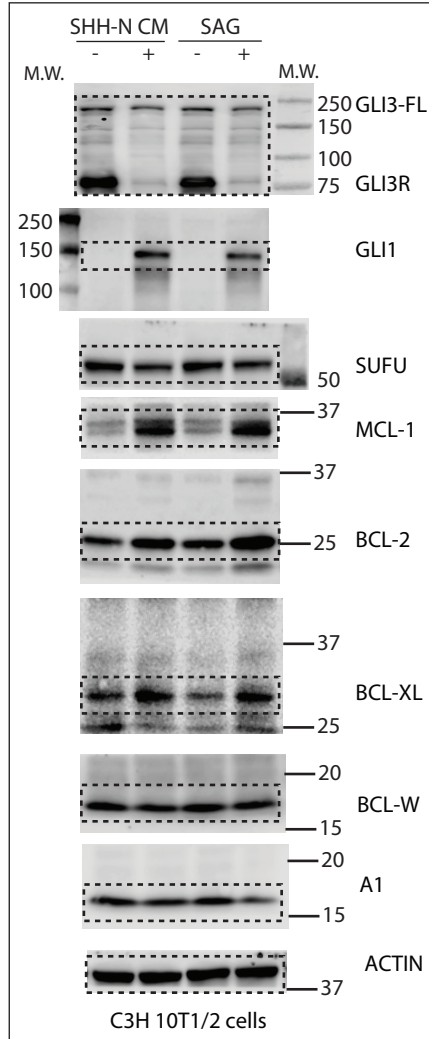**Fig. 3g**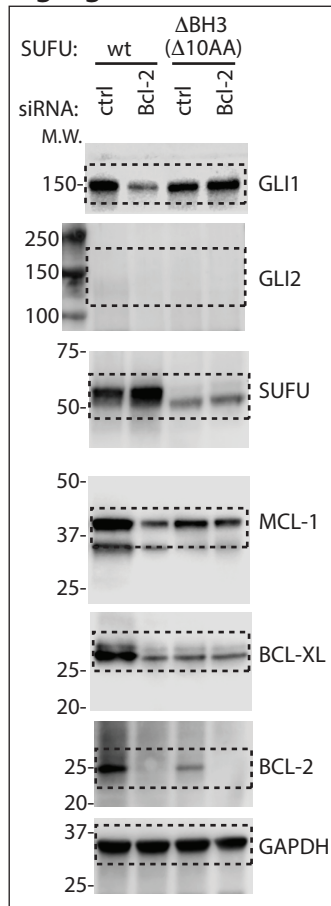**Fig. 3h**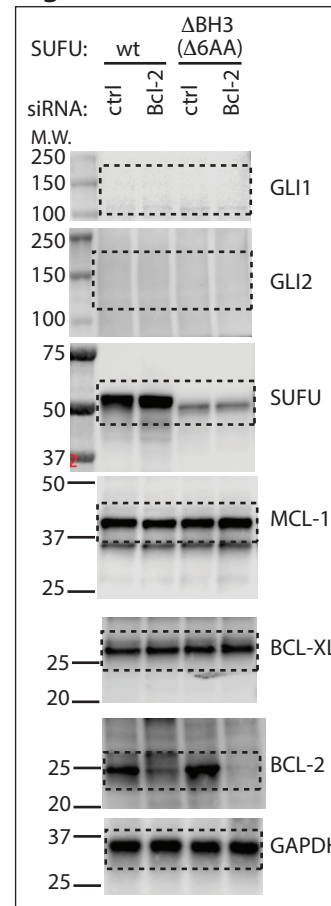**Fig. 4b**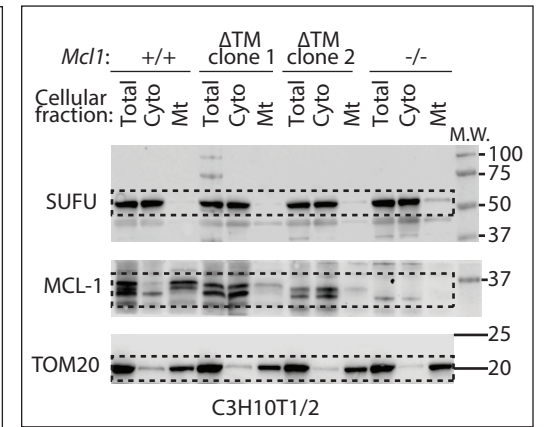**Fig. 4d**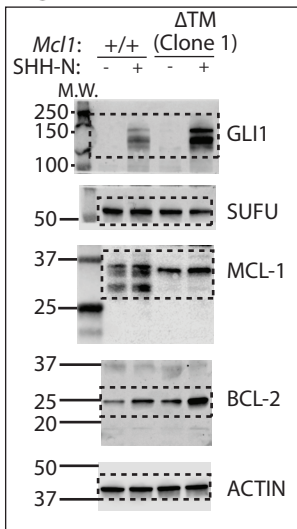**Fig. 3e**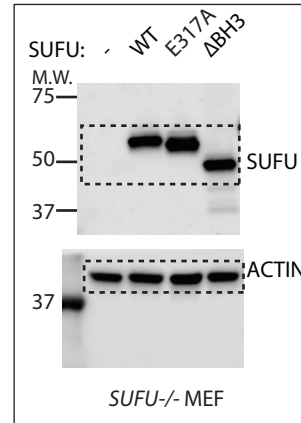**Fig. 4f**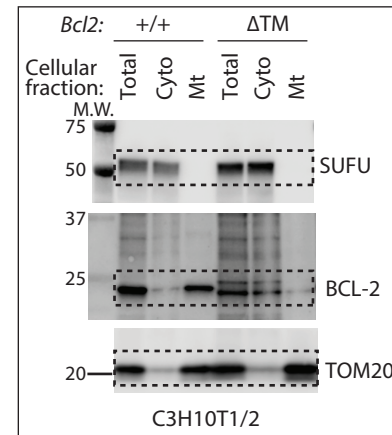**Fig. 4h**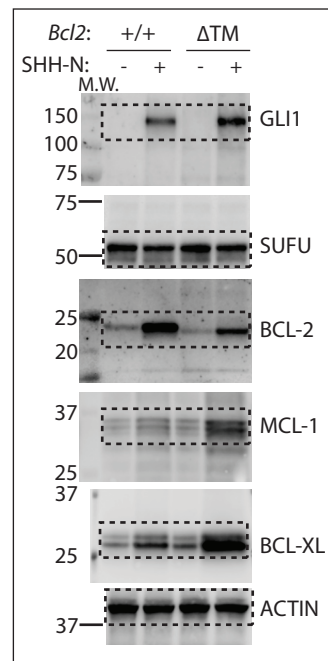



**Fig. S1b**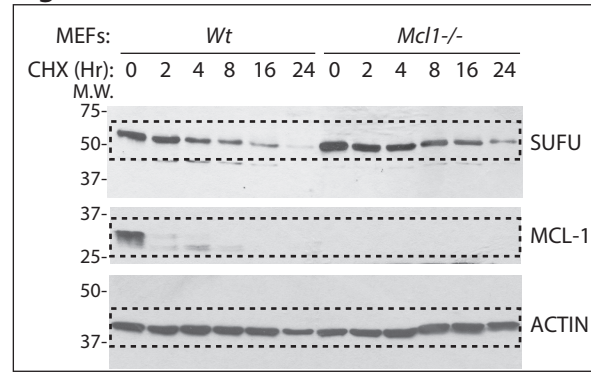**Fig. S1d**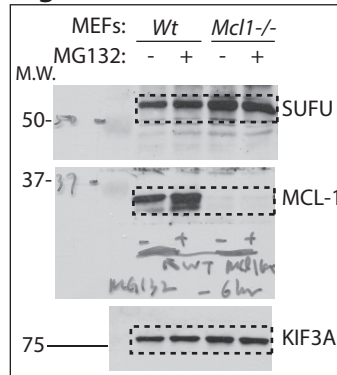**Fig. S1e**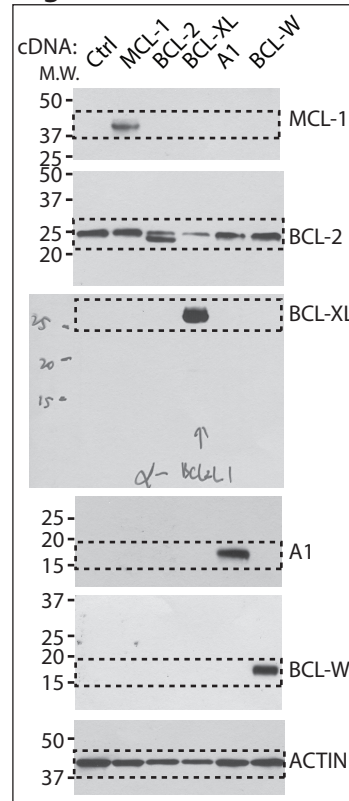**Fig. S1f**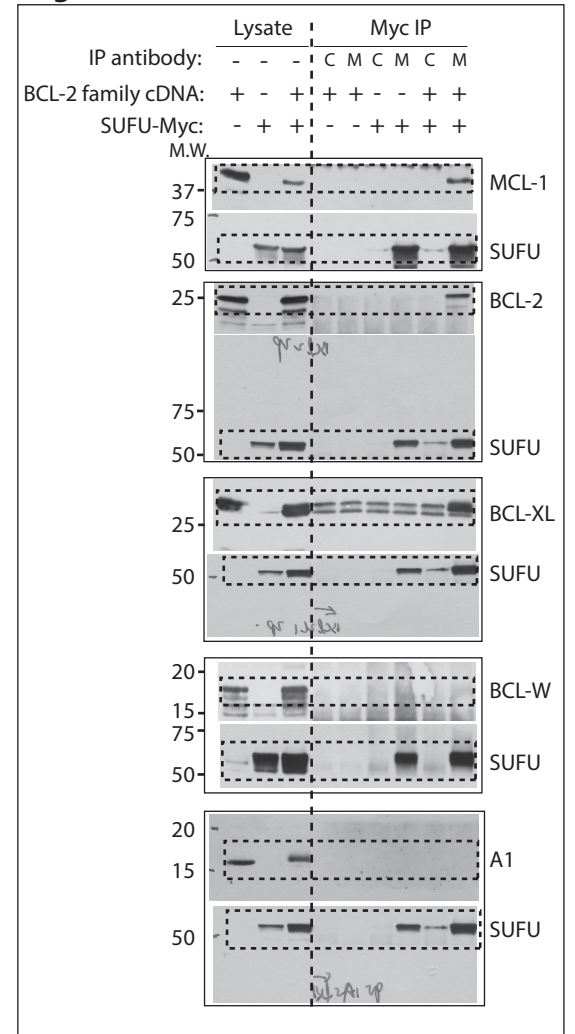**Fig. S2a**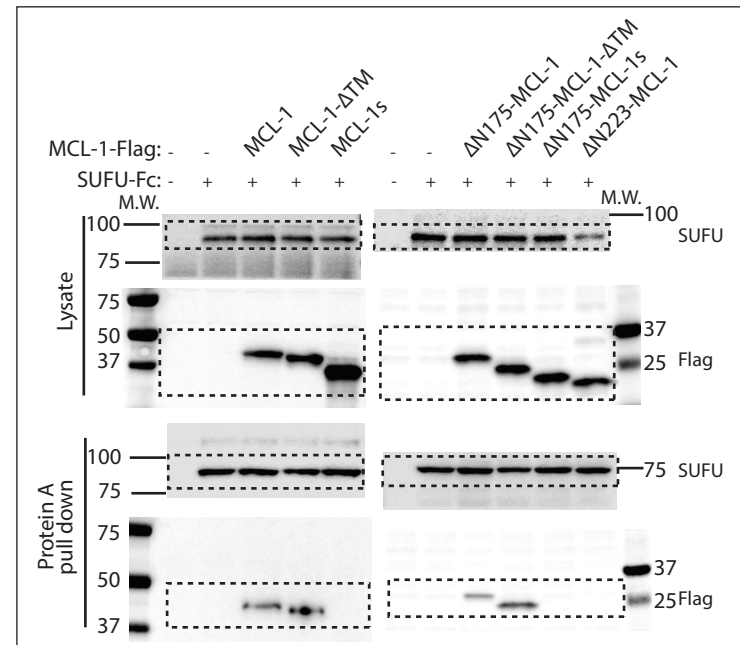**Fig. S1h**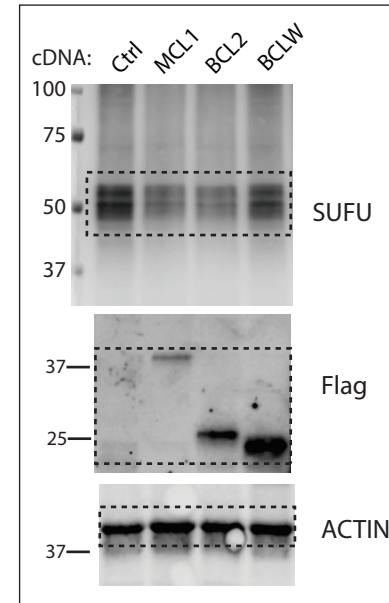

**Fig. S2d**

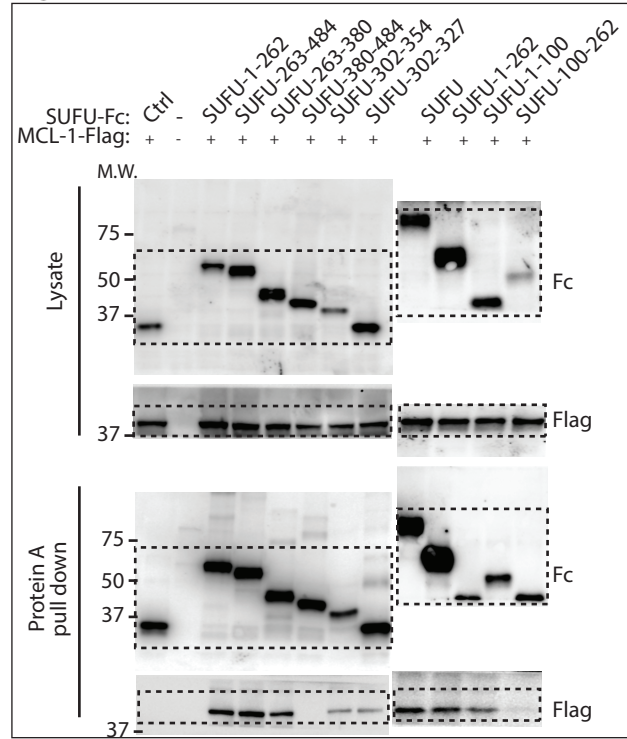

**Fig. S2h**

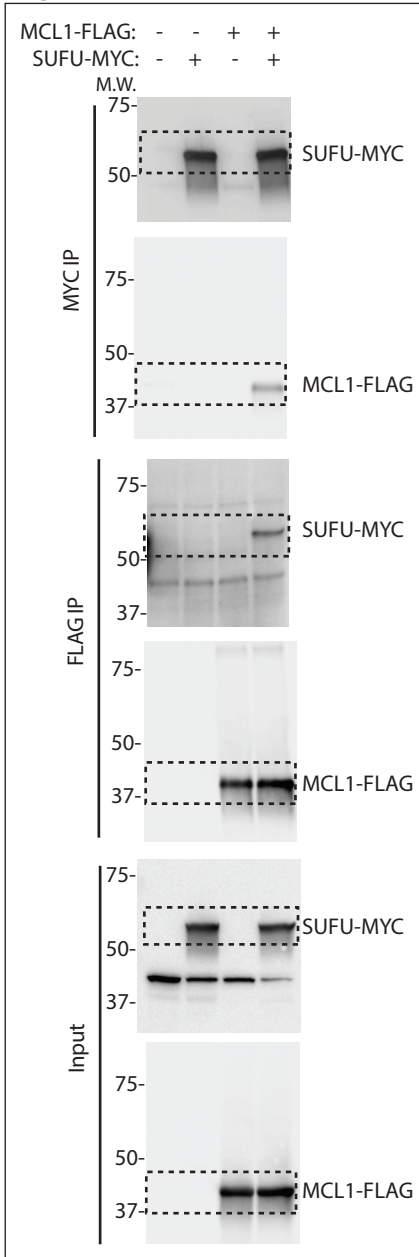

**Fig. S3d**

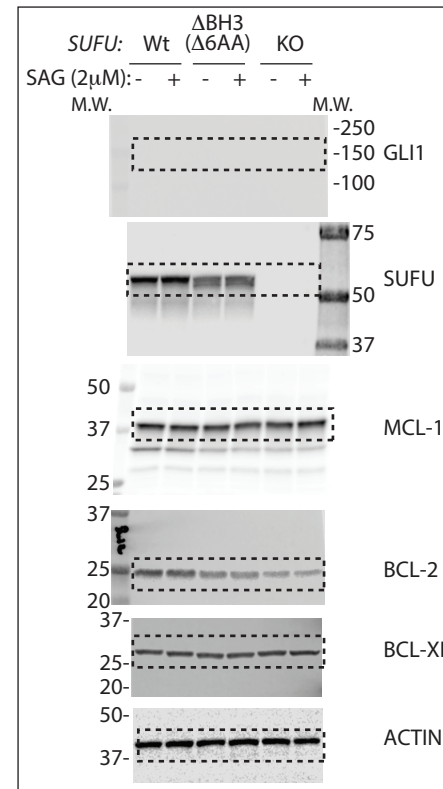

**Fig. S2j**

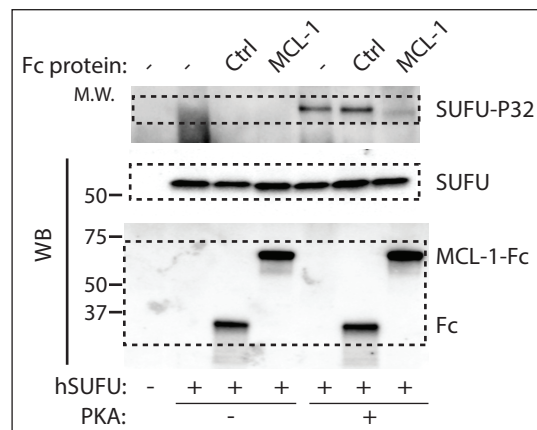

**Fig. S3g**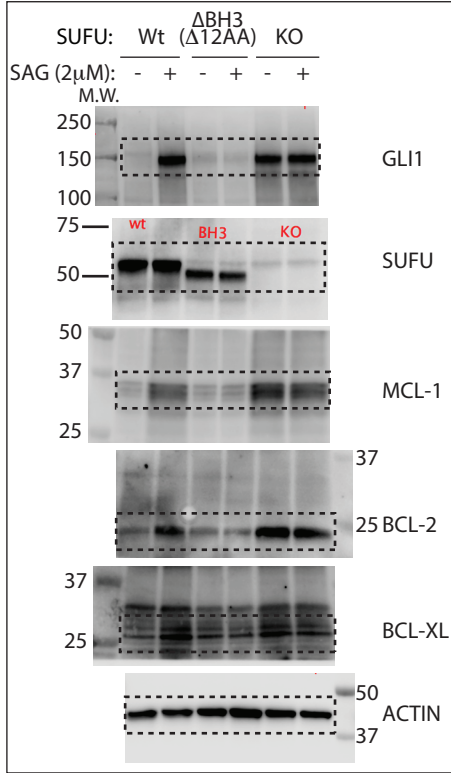**Fig. S3i**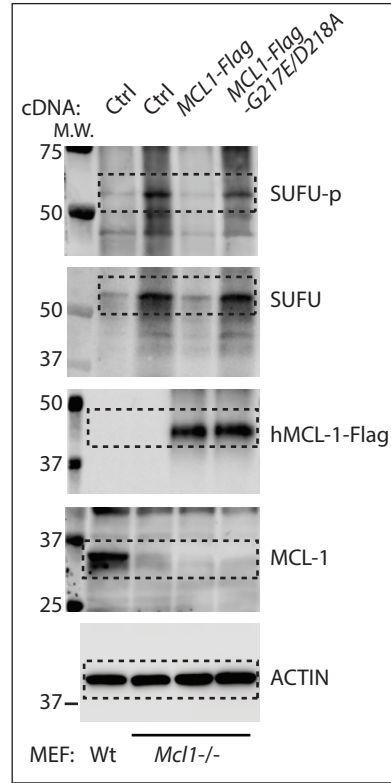**Fig. S5c**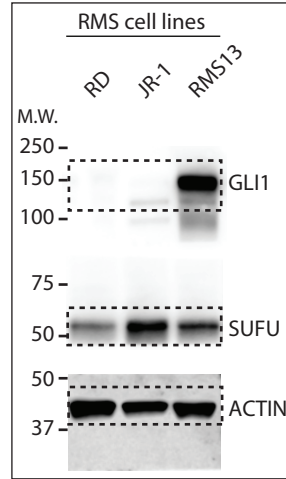

Supplement: NIHMS900689-supplement-7.pdf [file NIHMS900689-supplement-7.pdf]
