# Supplementary material
Source: PubMed Central journal article supplement (PMC5657599)

## Supplementary Figure 6

a

| SHH-medulloblastoma |              |            |             |                 |
|---------------------|--------------|------------|-------------|-----------------|
| Gene                | <i>PTCH1</i> | <i>SMO</i> | <i>SUFU</i> | <i>GLI2</i> amp |
| Category            |              |            |             |                 |
| Infants (50)        | 42%          | 8%         | 37%         | 0%              |
| Children (33)       | 36%          | 0%         | 3%          | 47%             |
| Adults (50)         | 54%          | 30%        | 4%          | 0%              |

b

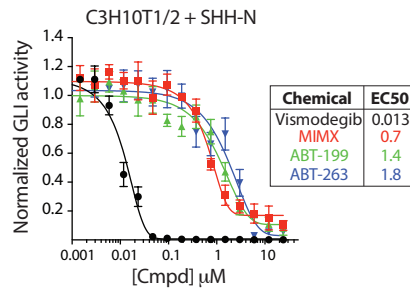

c

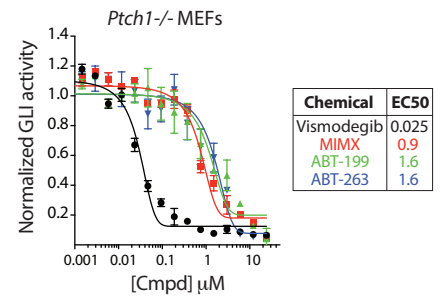

d

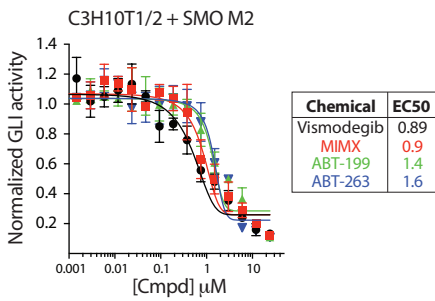

e

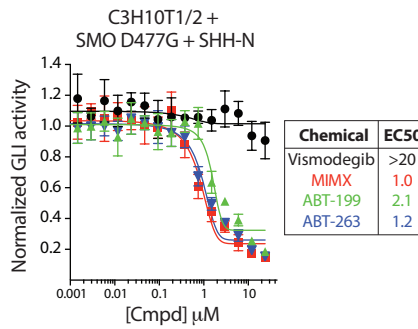

f

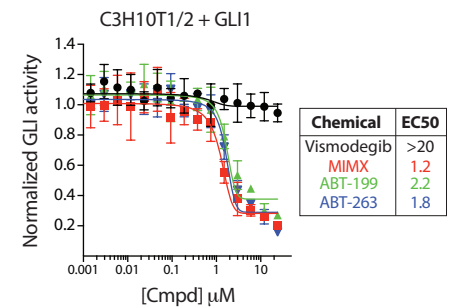

g

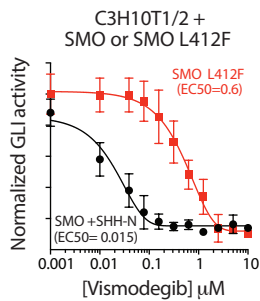

h

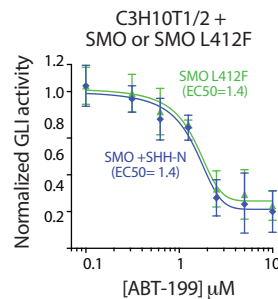

i

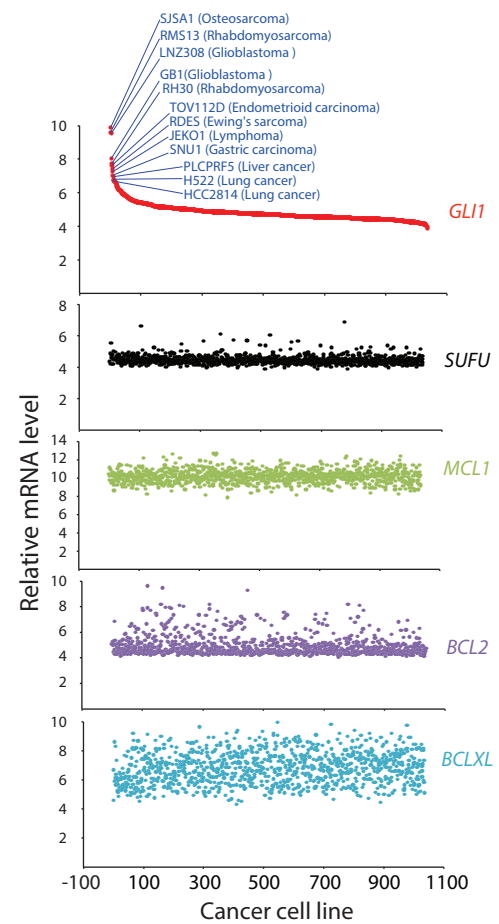

Supplement: NIHMS900689-supplement-6.pdf [file NIHMS900689-supplement-6.pdf]
