# Supplementary material
Source: PubMed Central journal article supplement (PMC5657599)

## Supplementary Figure 1

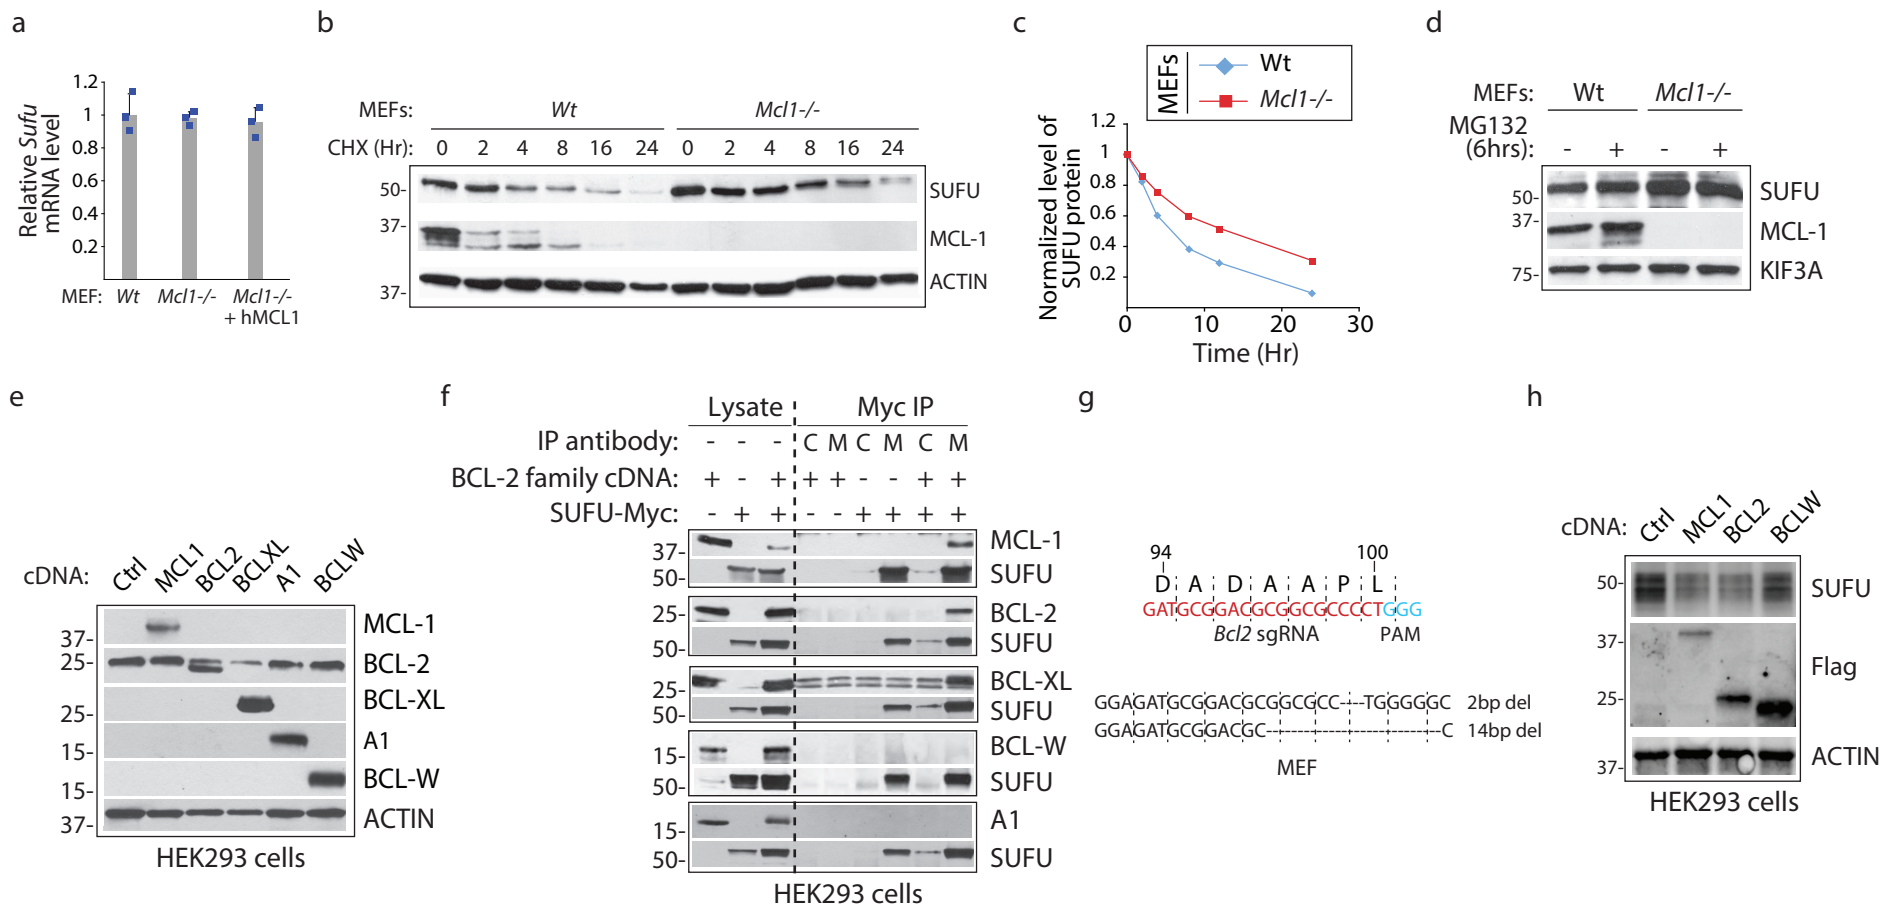

Supplement: NIHMS900689-supplement-1.pdf [file NIHMS900689-supplement-1.pdf]

# Supplementary Figure 2

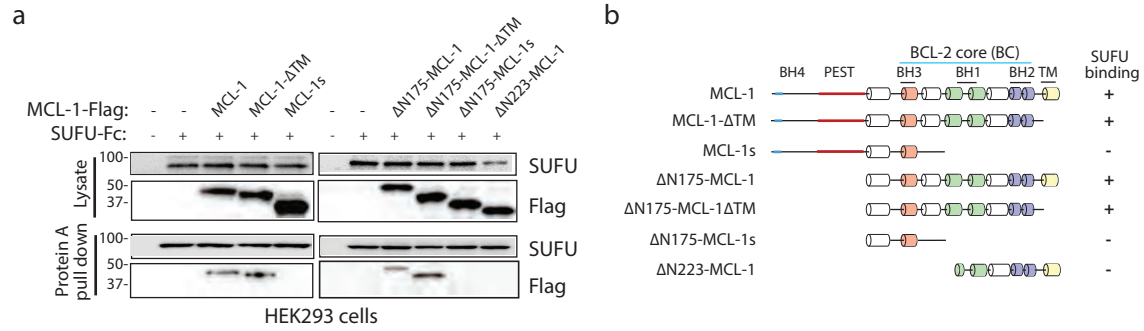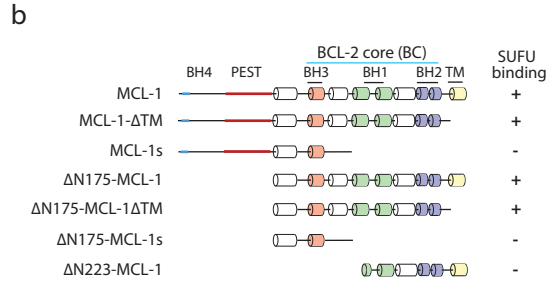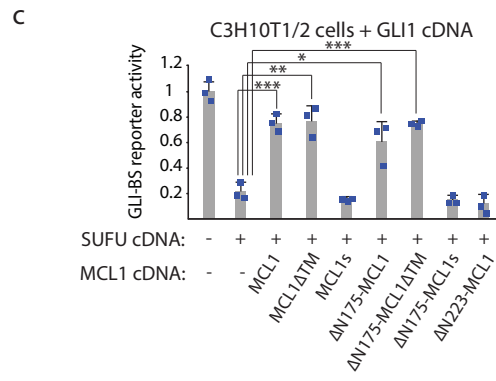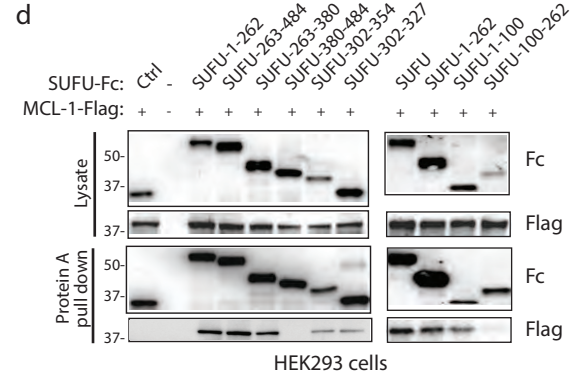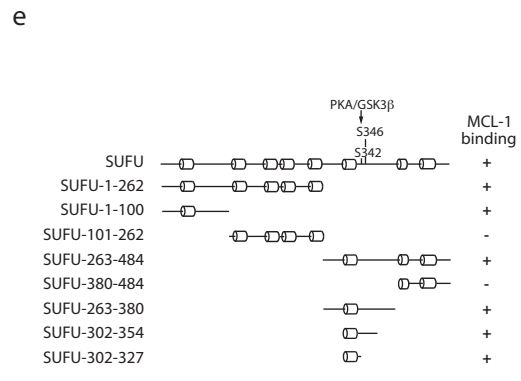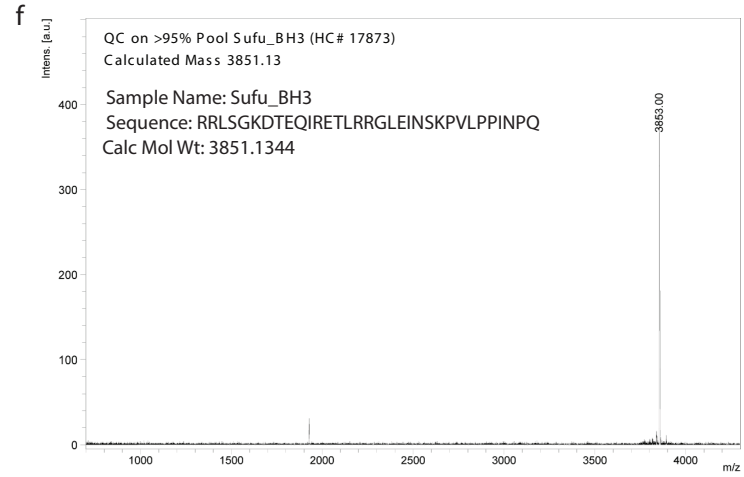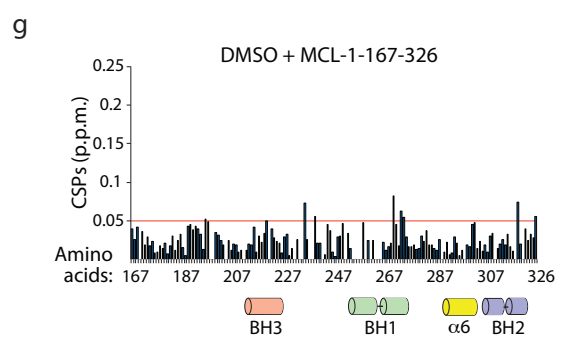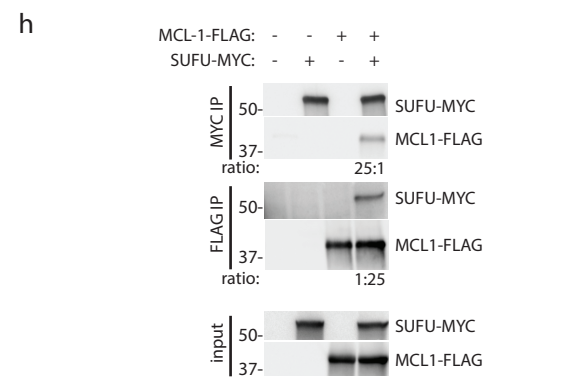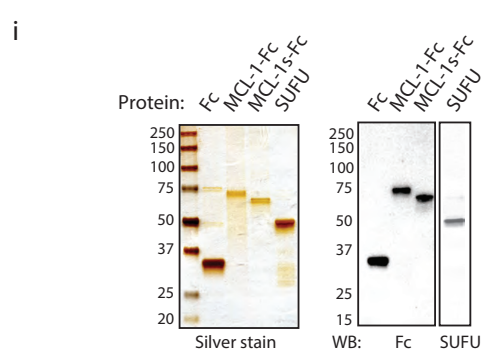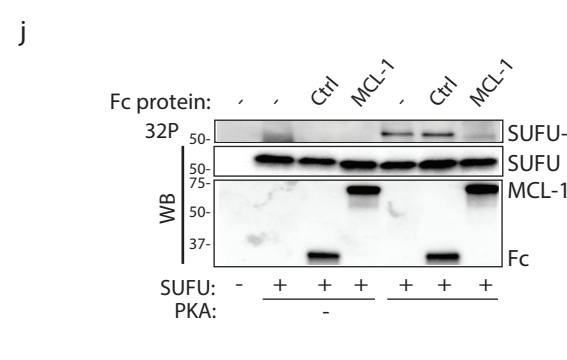

Supplement: NIHMS900689-supplement-2.pdf [file NIHMS900689-supplement-2.pdf]

# Supplementary Figure 3

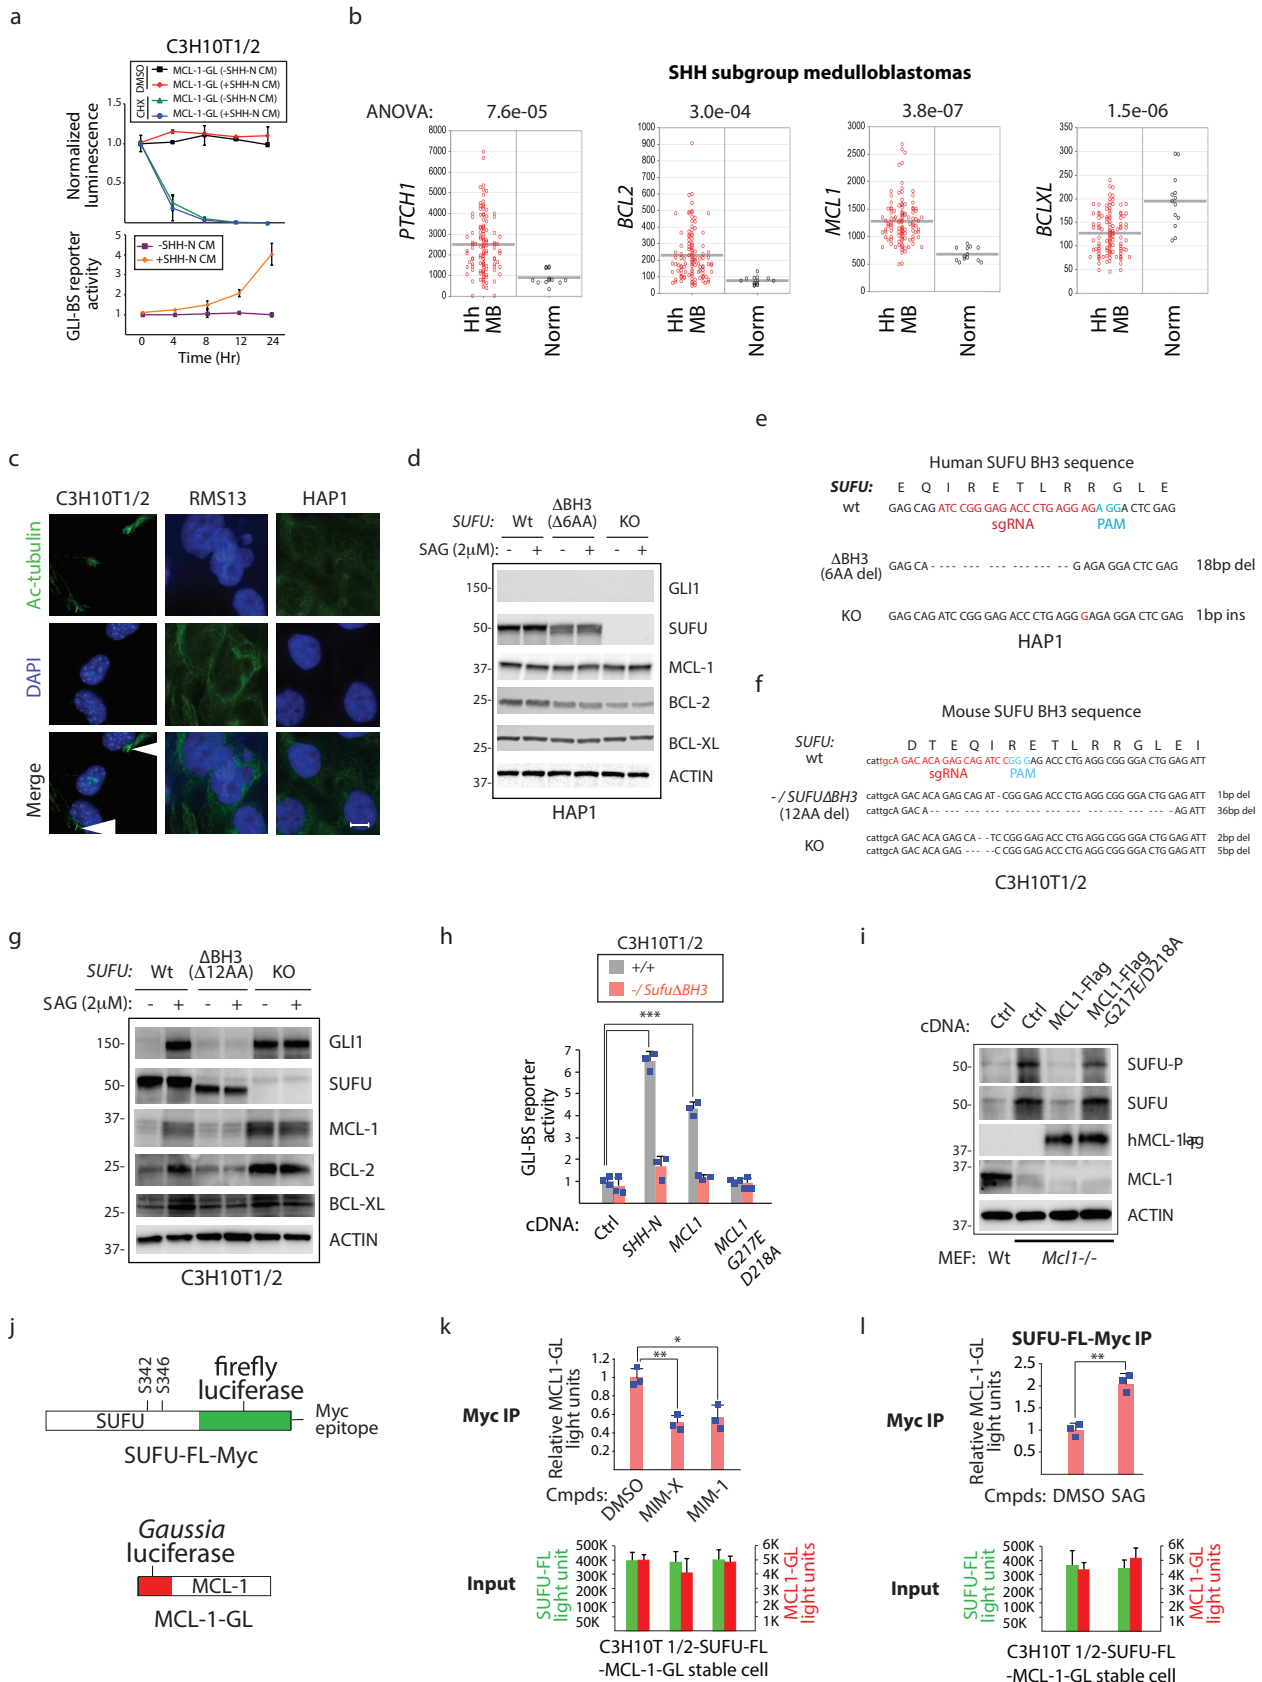

Supplement: NIHMS900689-supplement-3.pdf [file NIHMS900689-supplement-3.pdf]

## Supplementary Figure 4

a

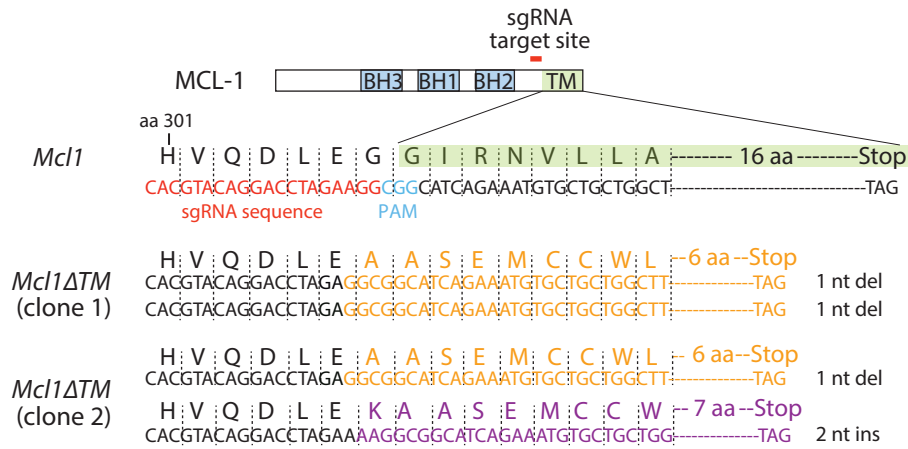

b

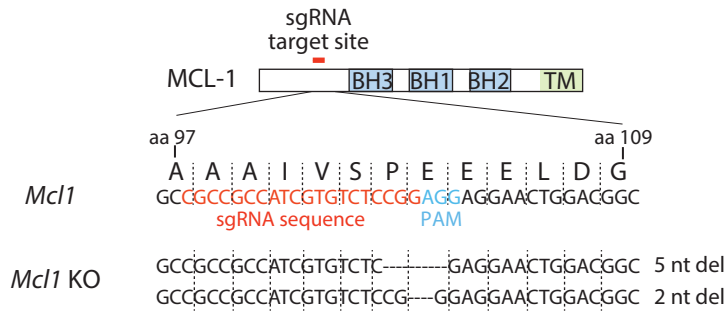

c

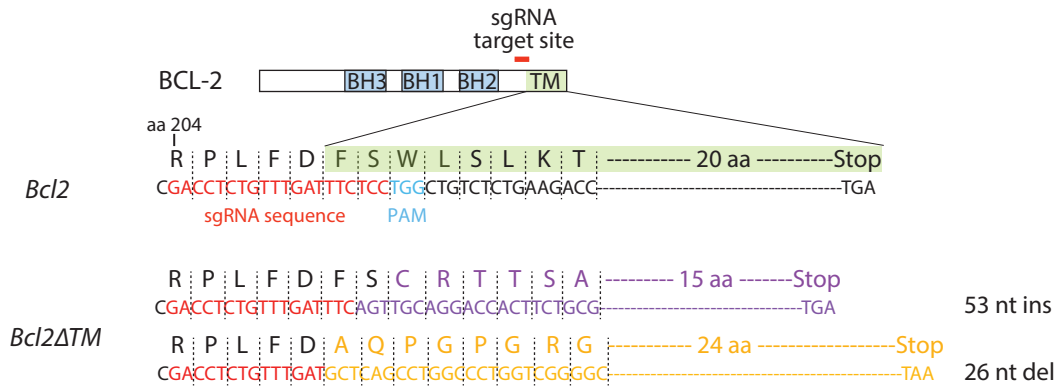

Supplement: NIHMS900689-supplement-4.pdf [file NIHMS900689-supplement-4.pdf]

## Supplementary Figure 5

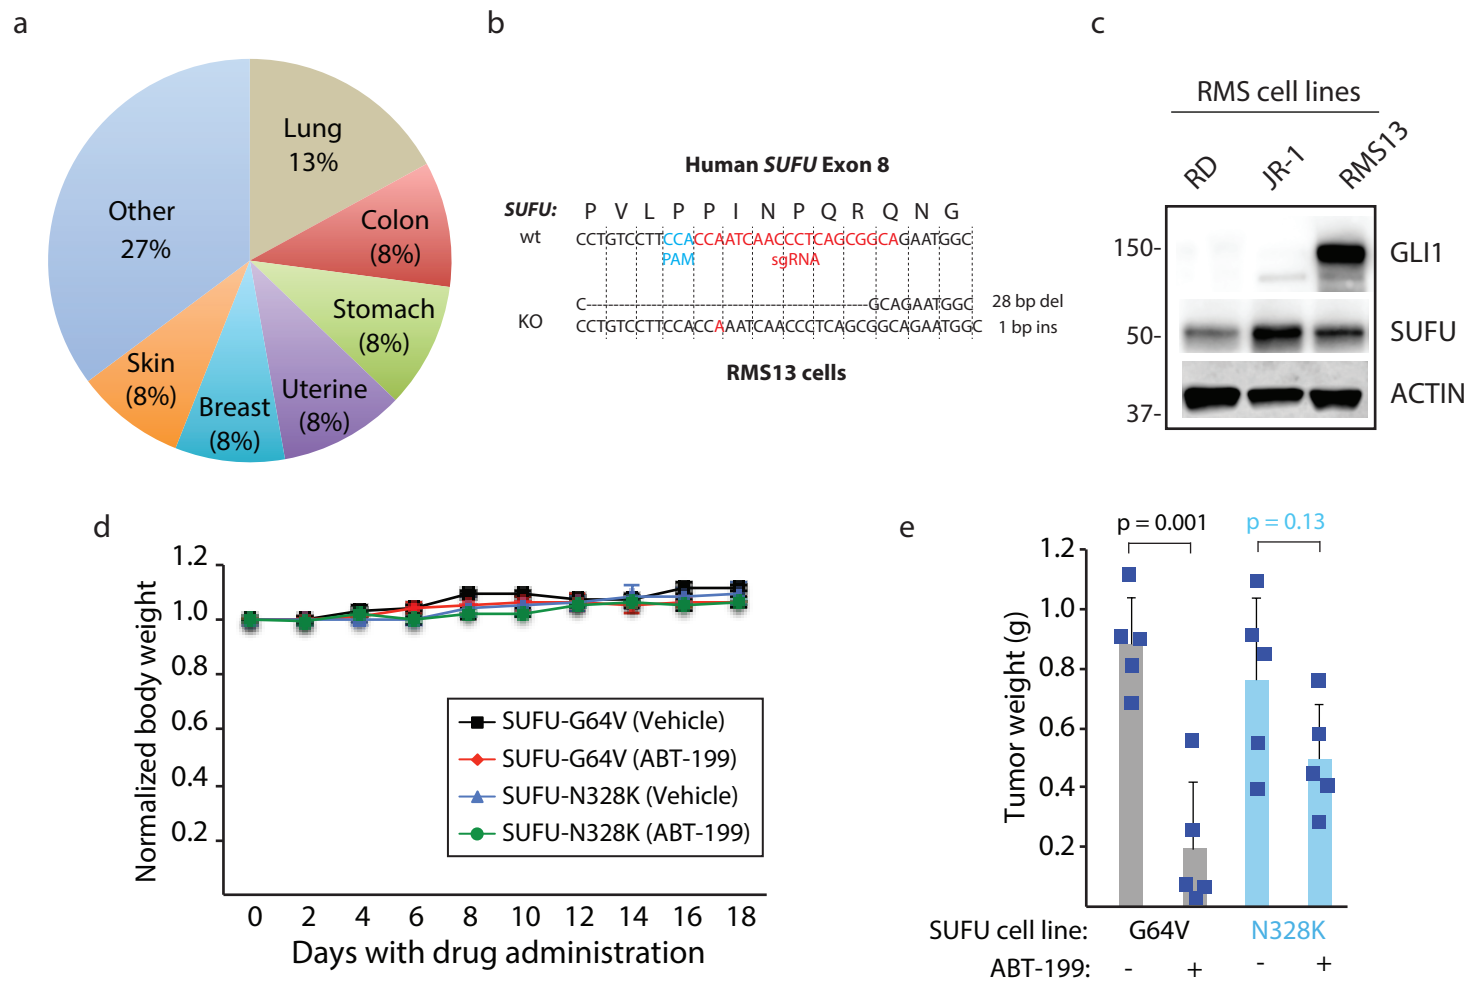

Supplement: NIHMS900689-supplement-5.pdf [file NIHMS900689-supplement-5.pdf]
